# Supplementary material for: Gene signature for prediction of radiosensitivity in human papillomavirus-negative head and neck squamous cell carcinoma
Source: PubMed Central journal article supplement — Radiat Oncol J. 2020 Jun 9;38(2):99–108. doi: 10.3857/roj.2020.00136 (PMC7533413; doi:10.3857/roj.2020.00136), 2020-06-09
Supplement: roj-2020-00136-suppl.pdf [file roj-2020-00136-suppl.pdf]

## Supplementary Materials

**Table S1.** Genes correlated with survival fraction after 2-Gy radiation in HPV-negative head and neck squamous cell carcinoma cell lines

|                                                 | Gene symbol                      | Gene name                                                          | AUC    | Fold change | Correlation coefficient | p-value |
|-------------------------------------------------|----------------------------------|--------------------------------------------------------------------|--------|-------------|-------------------------|---------|
| 6 genes increased in radioresistant cell lines  | CD200R1                          | CD200 receptor 1                                                   | 1      | 4.598       | 0.911                   | 0.001   |
|                                                 | TAS2R8                           | taste 2 receptor member 8                                          | 1      | 23.873      | 0.907                   | 0.001   |
|                                                 | CR1L                             | complement C3b/C4b receptor 1 like                                 | 1      | 7.561       | 0.883                   | 0.002   |
|                                                 | IL9R                             | interleukin 9 receptor                                             | 1      | 5.688       | 0.758                   | 0.018   |
|                                                 | KRT8                             | keratin 8                                                          | 1      | 12.024      | 0.698                   | 0.037   |
|                                                 | TXNRD1                           | thioredoxin reductase 1                                            | 1      | 4.568       | 0.690                   | 0.040   |
| 35 genes decreased in radioresistant cell lines | CCDC102B                         | coiled-coil domain containing 102B                                 | 1      | 17.674      | -0.894                  | 0.001   |
|                                                 | KIRREL2                          | kirre like nephrin family adhesion molecule 2                      | 1      | 31.715      | -0.894                  | 0.001   |
|                                                 | ART3                             | ADP-ribosyltransferase 3                                           | 1      | 12.633      | -0.868                  | 0.002   |
|                                                 | IFLTD1                           | intermediate filament tail domain-containing protein 1             | 1      | 27.258      | -0.866                  | 0.003   |
|                                                 | PDLIM4                           | PDZ and LIM domain 4                                               | 1      | 5.143       | -0.851                  | 0.004   |
|                                                 | KLHDC7B                          | kelch domain containing 7B                                         | 1      | 6.759       | -0.843                  | 0.004   |
|                                                 | KHDRBS3                          | KH RNA binding domain containing, signal transduction associated 3 | 1      | 6.607       | -0.826                  | 0.006   |
|                                                 | GAL3ST4                          | galactose-3-O-sulfotransferase 4                                   | 1      | 6.527       | -0.826                  | 0.006   |
|                                                 | PGBD5                            | piggyBac transposable element derived 5                            | 1      | 21.566      | -0.826                  | 0.006   |
|                                                 | ALDH2                            | aldehyde dehydrogenase 2 family member                             | 1      | 5.991       | -0.826                  | 0.006   |
|                                                 | ZNF71                            | zinc finger protein 71                                             | 1      | 77.278      | -0.800                  | 0.010   |
|                                                 | ALOX12                           | arachidonate 12-lipoxygenase, 12S type                             | 1      | 4.375       | -0.792                  | 0.011   |
|                                                 | B4GALNT3                         | beta-1,4-N-acetyl-galactosaminyltransferase 3                      | 1      | 7.837       | -0.783                  | 0.013   |
|                                                 | TNFRSF10C                        | TNF receptor superfamily member 10c                                | 1      | 5.801       | -0.783                  | 0.013   |
|                                                 | HSPB2                            | heat shock protein family B (small) member 2                       | 1      | 24.605      | -0.079                  | 0.013   |
|                                                 | LTBP1                            | latent transforming growth factor beta binding protein 1           | 1      | 9.446       | -0.775                  | 0.014   |
| SLC7A8                                          | solute carrier family 7 member 8 | 1                                                                  | 98.198 | -0.775      | 0.014                   |         |

|          |                                                                   |   |         |        |       |
|----------|-------------------------------------------------------------------|---|---------|--------|-------|
| SIRPA    | signal regulatory protein alpha                                   | 1 | 5.398   | -0.775 | 0.014 |
| SCARF2   | scavenger receptor class F member 2                               | 1 | 9.537   | -0.758 | 0.018 |
| SEPT5    | septin 5                                                          | 1 | 6.320   | -0.758 | 0.018 |
| GIMAP6   | GTPase, IMAP family member 6                                      | 1 | 175.767 | -0.757 | 0.018 |
| SIGLEC15 | sialic acid binding Ig like lectin 15                             | 1 | 5.720   | -0.744 | 0.022 |
| CXCL10   | C-X-C motif chemokine ligand 10                                   | 1 | 74.442  | -0.741 | 0.022 |
| PCDHB9   | protocadherin beta 9                                              | 1 | 8.076   | -0.741 | 0.022 |
| PAMR1    | peptidase domain containing associated with muscle regeneration 1 | 1 | 4.836   | -0.732 | 0.025 |
| DAND5    | DAN domain BMP antagonist family member 5                         | 1 | 8.506   | -0.732 | 0.025 |
| CDHR1    | cadherin related family member 1                                  | 1 | 428.331 | -0.732 | 0.025 |
| CPS1     | carbamoyl-phosphate synthase 1                                    | 1 | 15.871  | -0.724 | 0.025 |
| VSTM2L   | V-set and transmembrane domain containing 2 like                  | 1 | 114.918 | -0.715 | 0.028 |
| ROS1     | ROS proto-oncogene 1, receptor tyrosine kinase                    | 1 | 318.110 | -0.715 | 0.030 |
| RTN4RL2  | reticulon 4 receptor like 2                                       | 1 | 11.152  | -0.707 | 0.033 |
| WNT11    | Wnt family member 11                                              | 1 | 128.523 | -0.707 | 0.033 |
| CXCL11   | C-X-C motif chemokine ligand 11                                   | 1 | 143.024 | -0.672 | 0.047 |
| PID1     | phosphotyrosine interaction domain containing 1                   | 1 | 6.382   | -0.672 | 0.047 |
| C10orf99 | chromosome 10 open reading frame 99                               | 1 | 138.221 | -0.667 | 0.050 |

HPV, human papillomavirus; AUC, area under the receiver operating characteristic curve.
